# Supplementary material for: Programmable RNA multiphasic condensates and act as micromotor for biomoleculeas delivery
Source: Research Square preprint supplement (doi:10.21203/rs.3.rs-6869988/v1), 2025-06-20
Supplement: Supplementary file 1 [file b73fe3e04d1727d48b471e2a.docx]

**Supplementary Information**

**Programmable RNA multiphasic condensates and act as micromotor for biomoleculeas delivery**

Long Wang1†, Ting Zhu1†, Xinyi Guo2, Weiwei Zhang1, Yang Xiao1, Bin Li2, Yijie Ma1, Dinghua Wang1, Ying Cui1, Yuting Dai1,Shengyuan Deng2 and Kewei Ren1*

1School of Chemistry and Chemical Engineering, Nanjing University of Science and Technology, Nanjing, 210094, China.

2School of Environmental and Biological Engineering, Nanjing University of Science and Technology, Nanjing 210094, P.R. China.

†These authors contributed equally to this work.

*Corresponding author


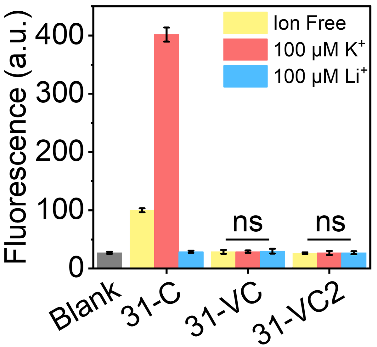


**Supplementary Fig. 1. Characterization of G-quadruplex in different RNAs.** Fluorescence intensity of 1 μM ThT incubated without (Blank) and with1 μM 31-C (31-C), 31-VC (31-VC) or 31-VC2 (31-VC2) at 37 °C in the absence (Ion Free) and presence of 100 μM K+ or Li+. The error bars indicate mean ± s.d. (n = 3 independent samples).


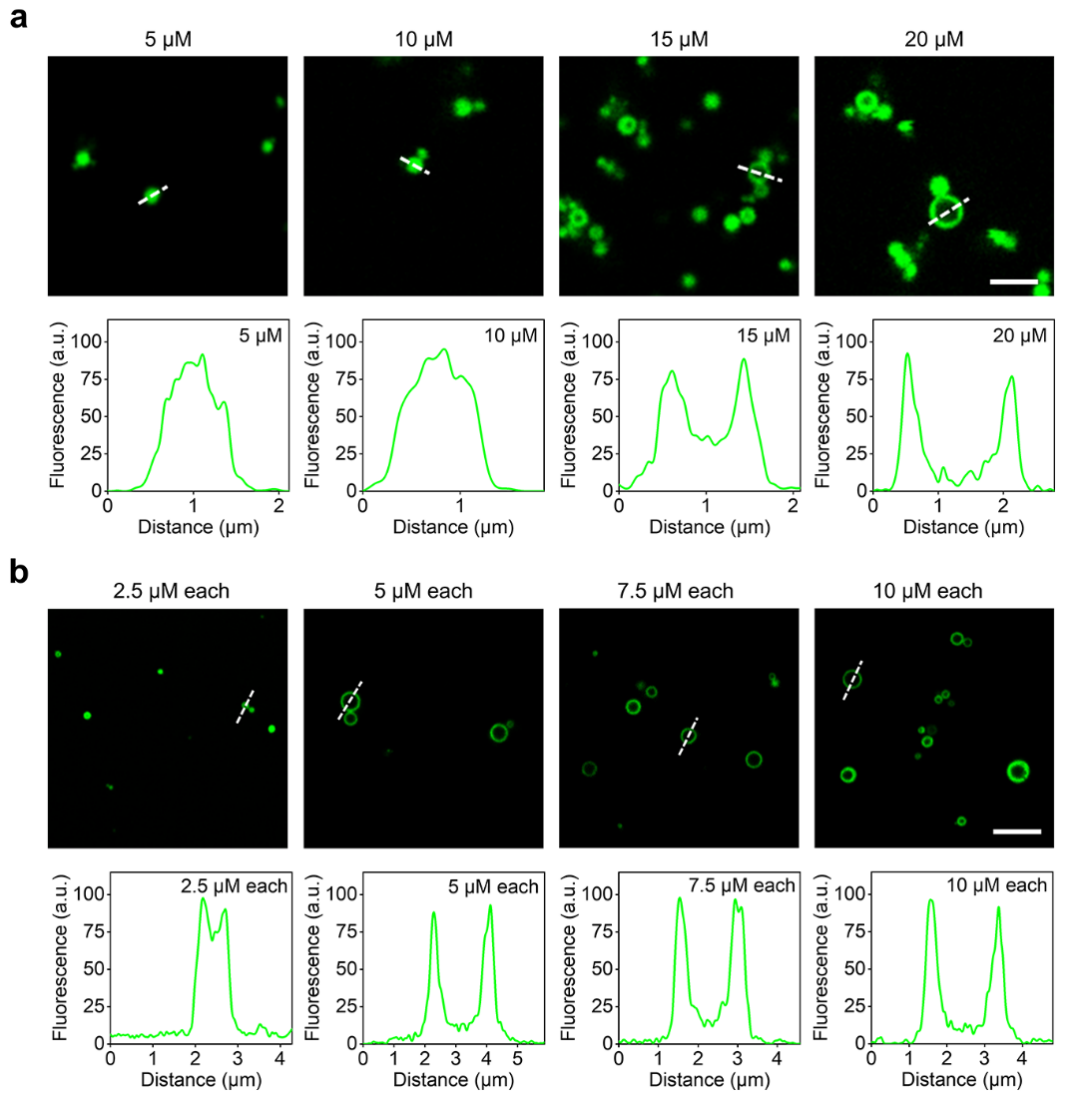


**Supplementary Fig. 2. Effects of RNA concentrations on the structure and morphology of condensate. a,** Representativeconfocal fluorescence imaging and fluorescence intensity distribution of RNA condensates assembled with 5, 10, 15 and 20 μM 31-dB, and stained with 1 × SYBR Gold. Scale bar, 2.5 μm**. b,** Representativeconfocal fluorescence imaging and fluorescence intensity distribution of RNA condensates assembled with 31-P and 31-C mixture at each RNA concentration of 2.5, 5, 7.5 and 10 μM, and stained with 1 × SYBR Gold. Scale bar, 5 μm.


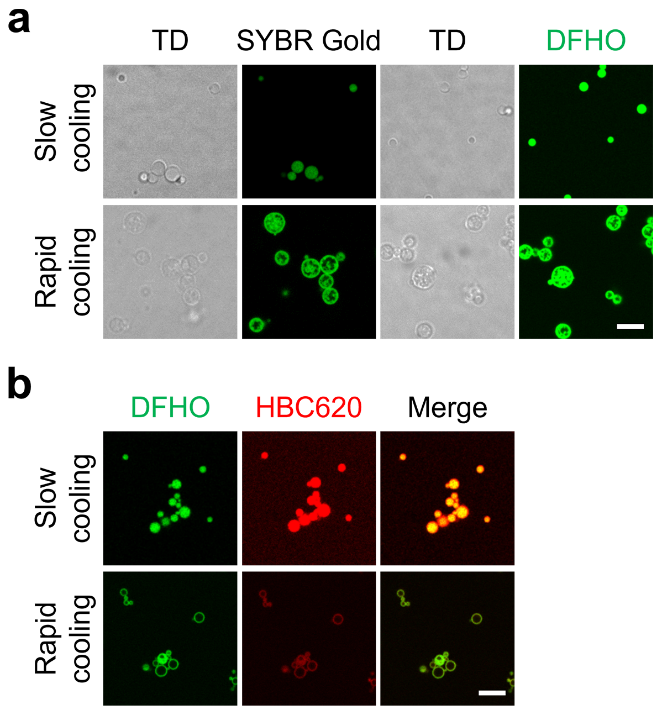


**Supplementary Fig. 3. Effects of cooling rates on the structure and morphology of the condensate. a,** Representativeconfocal fluorescence imaging of RNA condensates assembled with 31-C by rapid or slow cooling, stained with 1 × SYBR Gold or 100 μM DFHO, respectively. Scale bar, 5 μm. **b,** Representativeconfocal fluorescence imaging of RNA condensates assembled with the mixture of 31-P and 31-C by rapid or slow cooling, stained with 100 μM HBC620 and 100 μM DFHO. Scale bar, 5 μm.


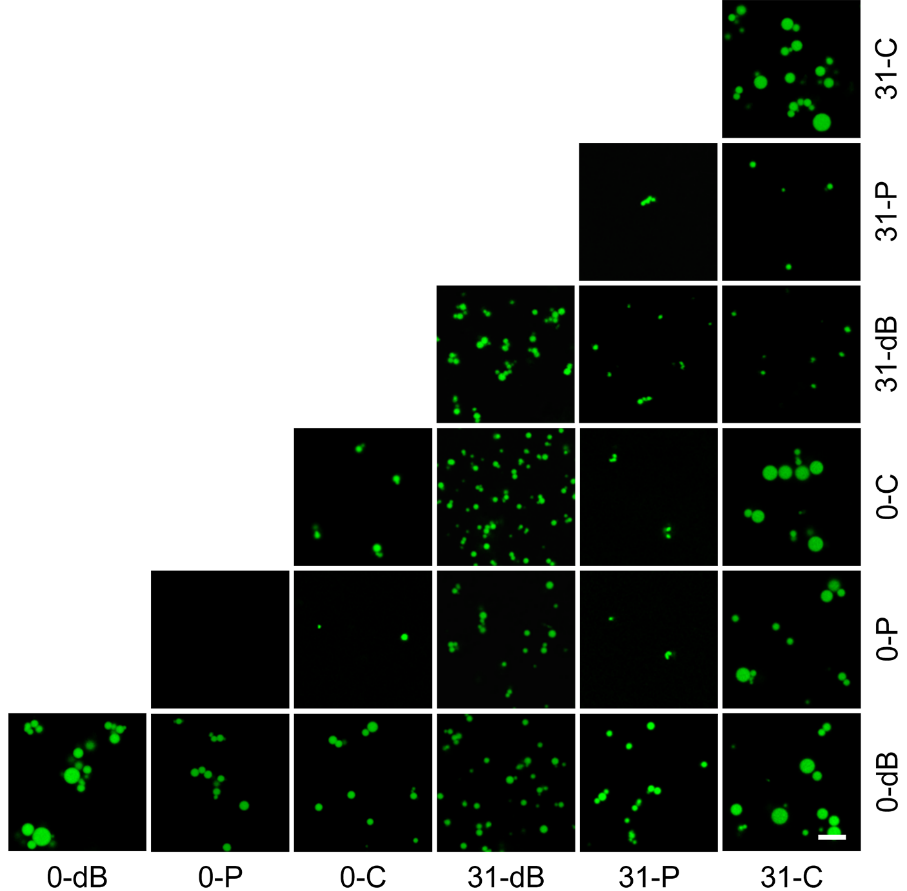


**Supplementary Fig. 4. RNA condensates assembled with slow cooling.** Representativeconfocal fluorescence imaging of RNA condensates assembled by orthogonal mixing of 0-dB, 0-P, 0-C, 31-dB, 31-P and 31-C with slow cooling, and stained with 1 × SYBR Gold. Scale bar, 5 μm.


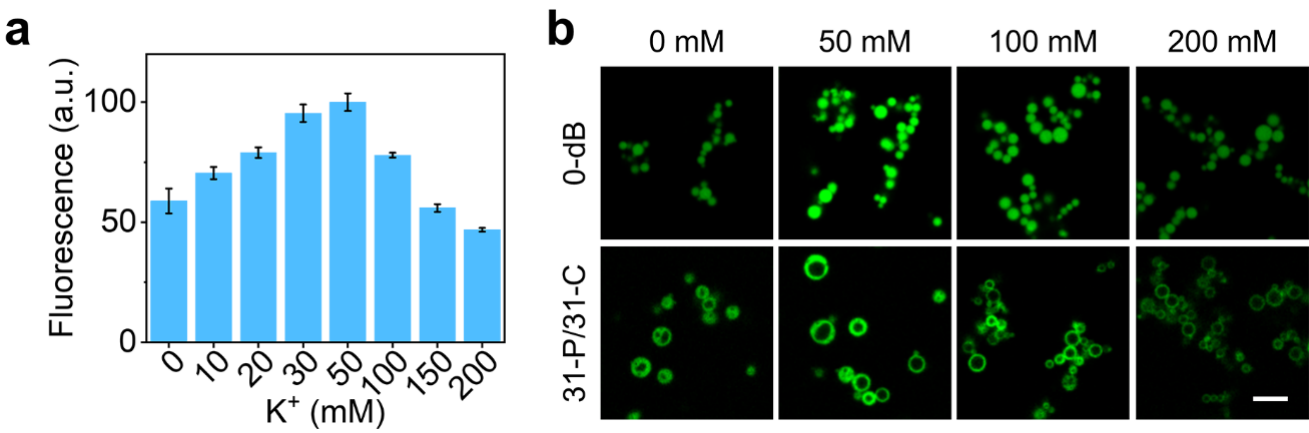


**Supplementary Fig. 5. Effects of potassium ion concentrations on condensates.** **a**, Normalized fluorescence signals of 31-C incubated with 1 μM ThT at different K+ concentration. The error bars indicate mean ± s.d. (n = 3 independent samples). **b**, Representativeconfocal fluorescence imaging of RNA condensates assembled with 20 μM 0-dB, or the mixture of 10 μM 31-P and 10 μM 31-C (31-P/31-C) in presence of 60 mM Mg2+ and different K+ concentrations, then stained with 1 × SYBR Gold. Scale bar, 5 μm.


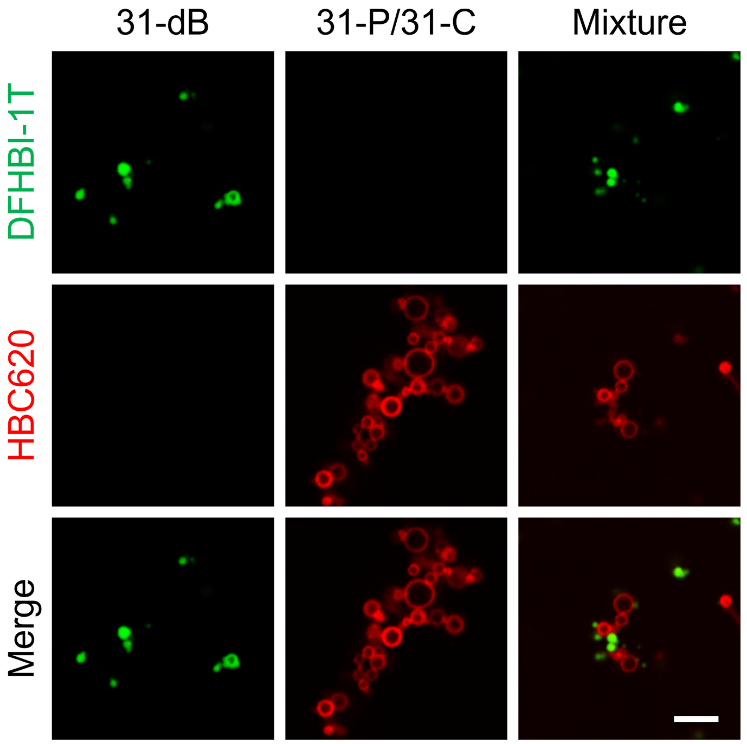


**Supplementary Fig. 6. Fusion of different condensates.** Representativeconfocal fluorescence imaging of 31-dB based condensates (31-dB), 31-P and 31-C mixture based condensates (31-P/31-C), and these two condensates mixture (mixture) incubated at 37 °C for 2-h, then stained with 100 μM DFHBI-1T and 100 μM HBC620. Scale bar, 5 μm.


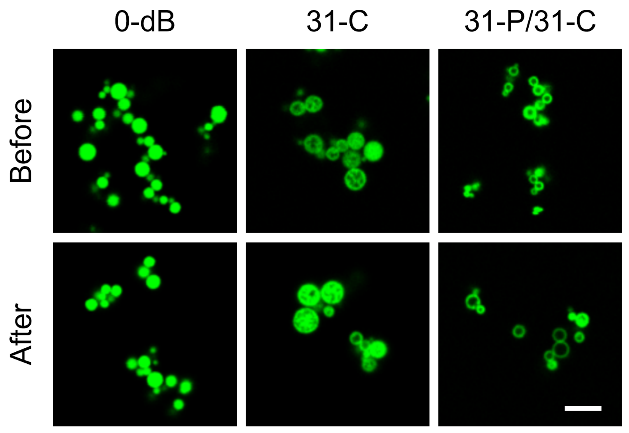


**Supplementary Fig. 7. Stability of RNA condensates.** Representativeconfocal fluorescence imaging of RNA condensates assembled with 0-dB, 31-C and the mixture of 31-P and 31-C (31-P/31-C) before (Before) and after centrifugation (After), then stained with 1 × SYBR Gold. Scale bar, 5 μm.


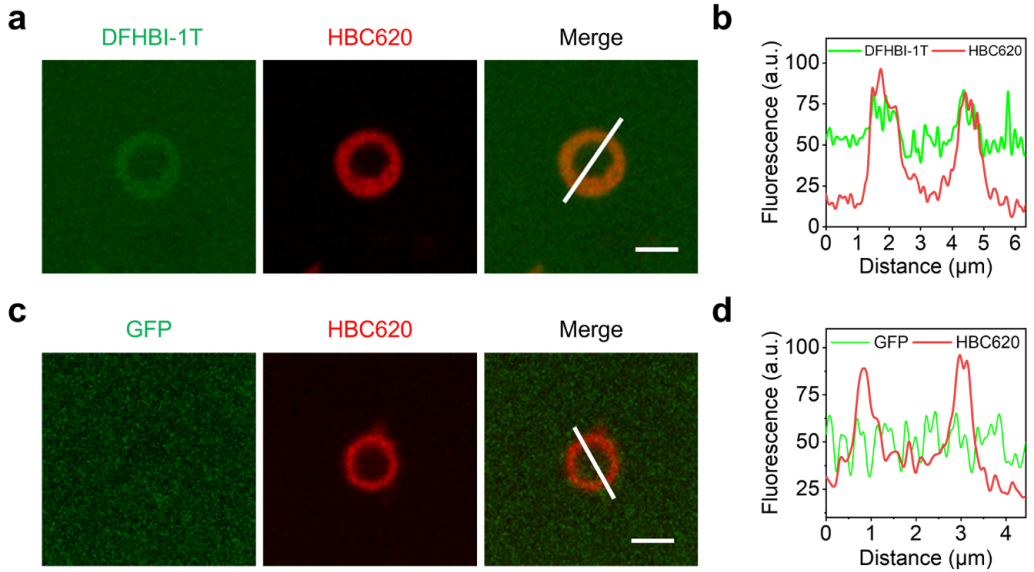


**Supplementary Fig. 8. Permeability of Soccer constructed by 31-P and 31-C mixture. a**, Representativeconfocal fluorescence imaging of 10 μM free 0-dB incubated with 10 μM Soccer assembled with mixture of 31-P and 31-C for 2 h, then stained with 100 μM DFHBI-1T (0-dB) and 100 μM HBC620 (31-P/31-C). Scale bar, 2 μm. **b**, The fluorescence intensity distribution of DFHBI-1T (0-dB) and HBC620 (31-P/31-C) indicated with white lines in **Supplementary Fig. 8a**, respectively. **c**, Representativeconfocal fluorescence imaging of 5 μM GFP incubated with 10 μM Soccer assembled with mixture of 31-P and 31-C for 2 h, then stained with 100 μM HBC620. Scale bar, 2 μm. **d**, The fluorescence intensity distribution of GFP and HBC620 (31-P/ 31-C) indicated with white lines in **Supplementary Fig. 8c**.


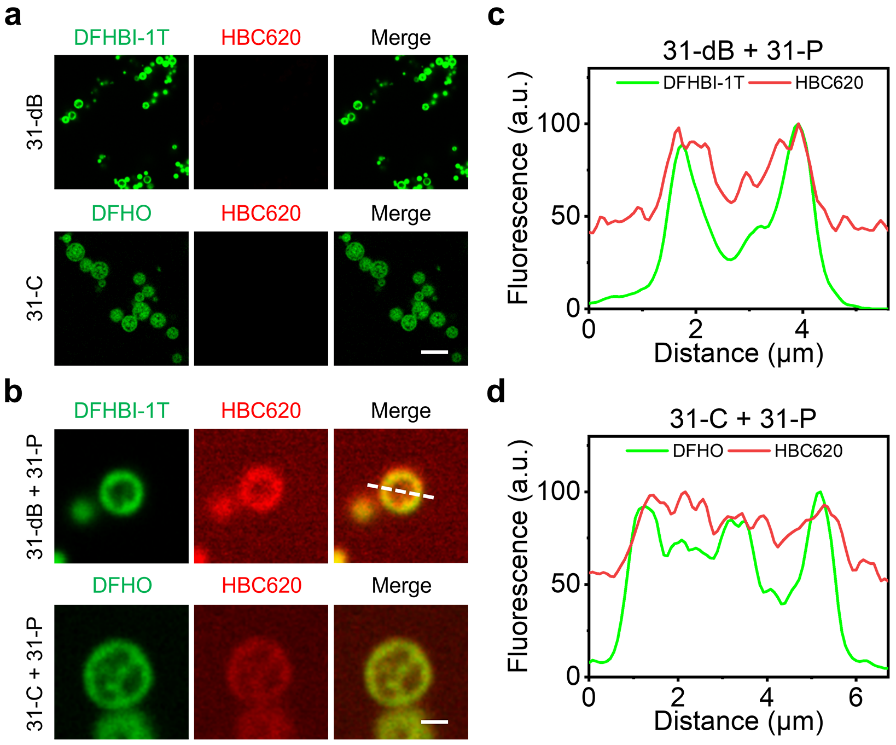


**Supplementary Fig. 9. Enrichment of 31-P in Soccer or Cuju.** Representative confocal fluorescence imaging of 10 μM RNA condensates assembled with 31-dB or 31-C by rapid cooling before (31-dB or 31-C) (**a**) and after incubation with 10 μM 31-P (31-dB + 31-P or 31-C + 31-P) for 2 h (**b**). Scale bar, 5 μm. **c,** The fluorescence intensity distribution of DFHBI-1T (31-dB) and HBC620 (31-P) indicated with white lines in **Supplementary Fig. 9b**, respectively. **d,** The fluorescence intensity distribution of DFHO (31-C) and HBC620 (31-P) indicated with white lines in **Supplementary Fig. 9b**, respectively.


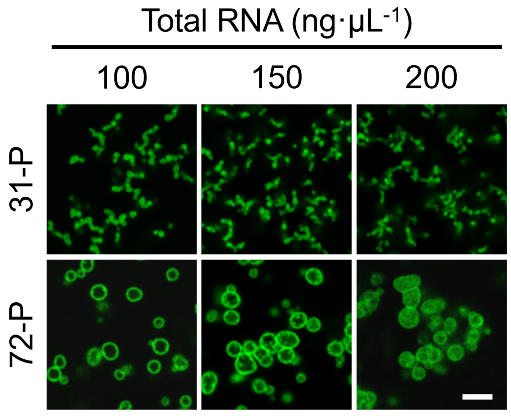


**Supplementary Fig. 10. Controllable regulation of different concentration total RNA based condensates with CUG repeats.** Representative confocal fluorescence imaging of the condensates assembled by mixing of different concentrations of total RNA with 10 μM 72-P or 10 μM 31-P, respectively. The RNA condensates were stained with 1 × SYBR Gold. Scale bar, 5 μm.


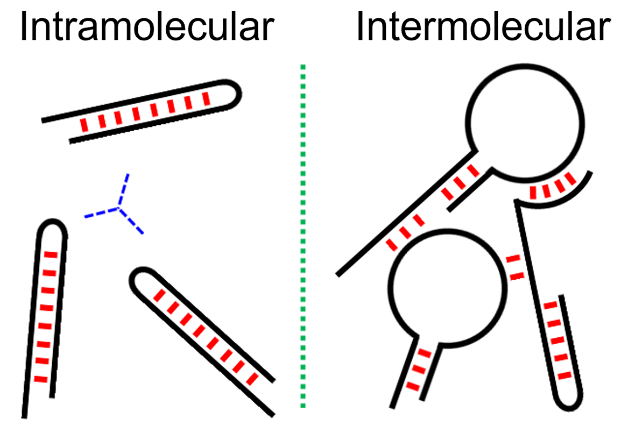


**Supplementary Fig. 11. Schematic for intramolecular and intermolecular RNA interactions in condensates.**


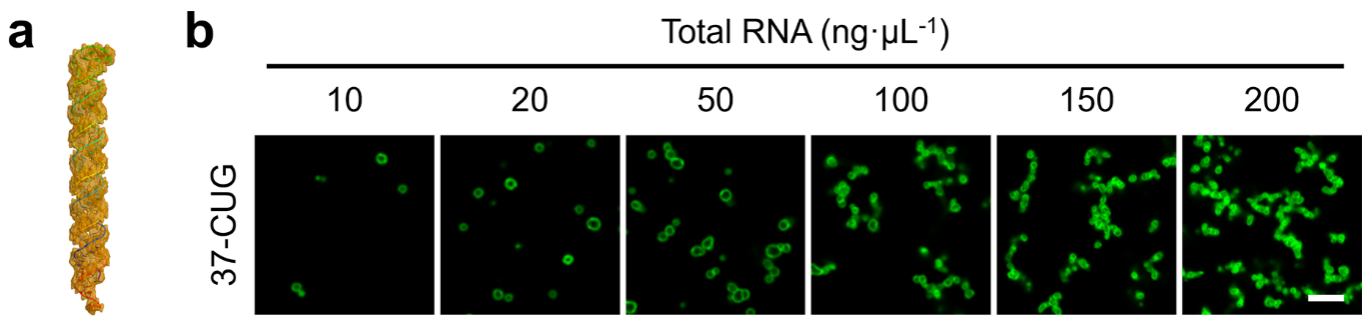


**Supplementary Fig. 12. Controllable regulation of total RNA based condensates with 37-CUG repeats. a**, 3D structures of 37-CUG simulated by RNA composer. **b**, Representative confocal fluorescence imaging of RNA condensates assembled with 37-CUG repeats with different concentrations of total RNA extracted from MCF-7 cells, then stained with 1 × SYBR Gold. Scale bar, 5 μm.


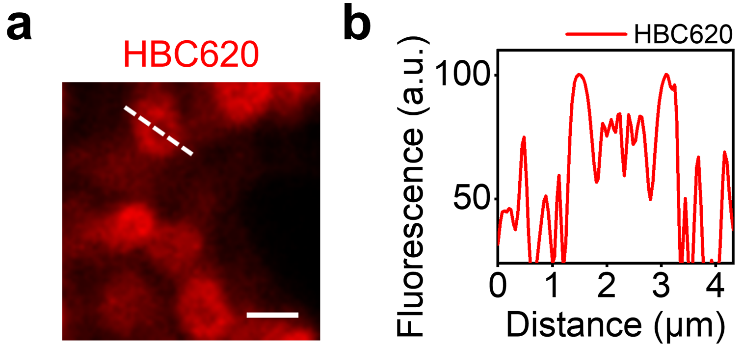


**Supplementary Fig. 13. Monocomponent RNA forms Soccer in mammalian cells.** **a**, Representative confocal fluorescence imaging of MCF-7 cells expressing 72-P. The cells were stained with 10 μM HBC620. Scale bars, 2 μm. **b**, The normalized fluorescence intensity distributions of HBC620 indicated with white lines in **Supplementary Fig. 13a**.


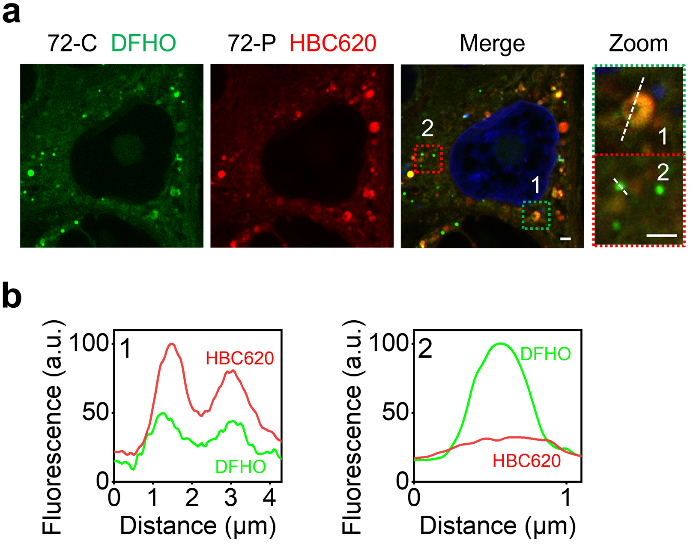


**Supplementary Fig. 14. Preparation of RNA multiphasic condensates in living cells. a**, Representative confocal fluorescence imaging of MCF-7 cells expressing both 72-C and 72-P. The cells were stained with 10 μM HBC620 and 10 μM DFHO. Scale bars, 2 μm. **b**, The normalized fluorescence intensity distributions of DFHO and HBC620 indicated with white lines in **Supplementary Fig. 14a**.


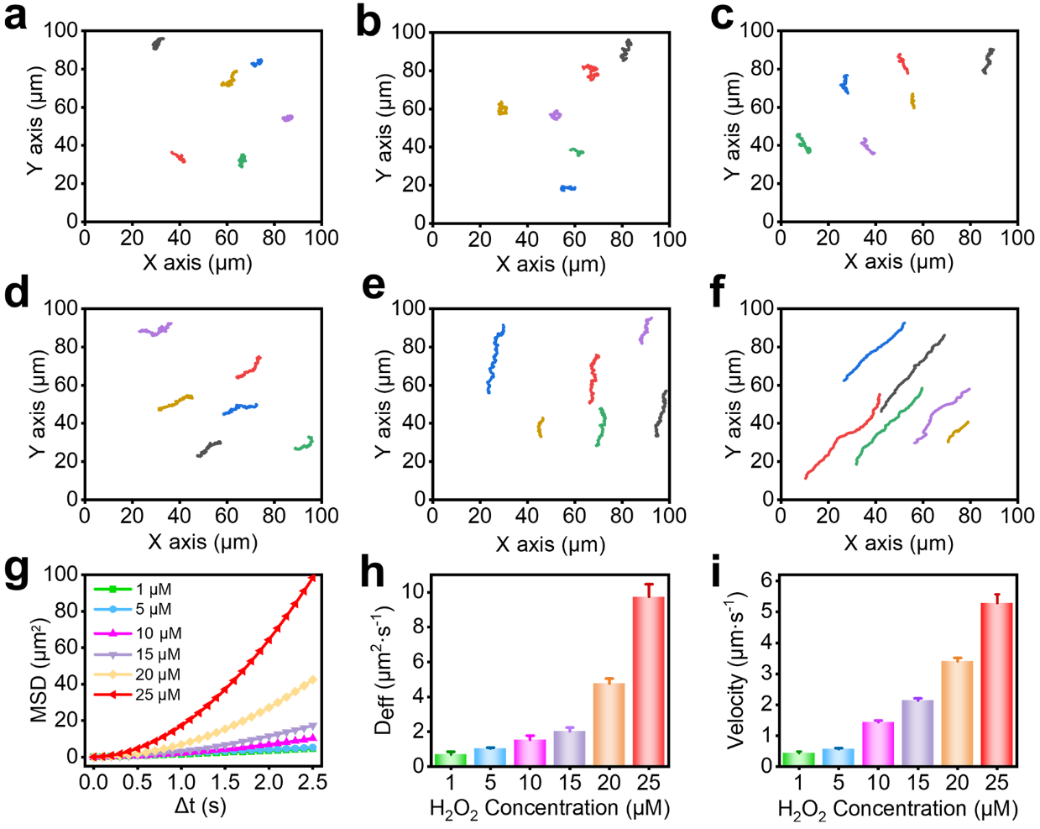


**Supplementary Fig. 15. Effects of H2O2 concentrations on the motion of RCM.** Motion behavior analysis of the RCM at H2O2 concentrations of 1 mM (**a**), 5 mM (**b**), 10 mM (**c**), 15 mM (**d**), 20 mM (**e**) and 25 mM (**f**). The MSD (Mean-square-displacement) (**g**), corresponding Deff (diffusion coefficient) (**h**), Velocity (**i**) of RCM at different concentrations of H2O2. The error bars indicate mean ± s.d. (n = 6 independent micromotor).


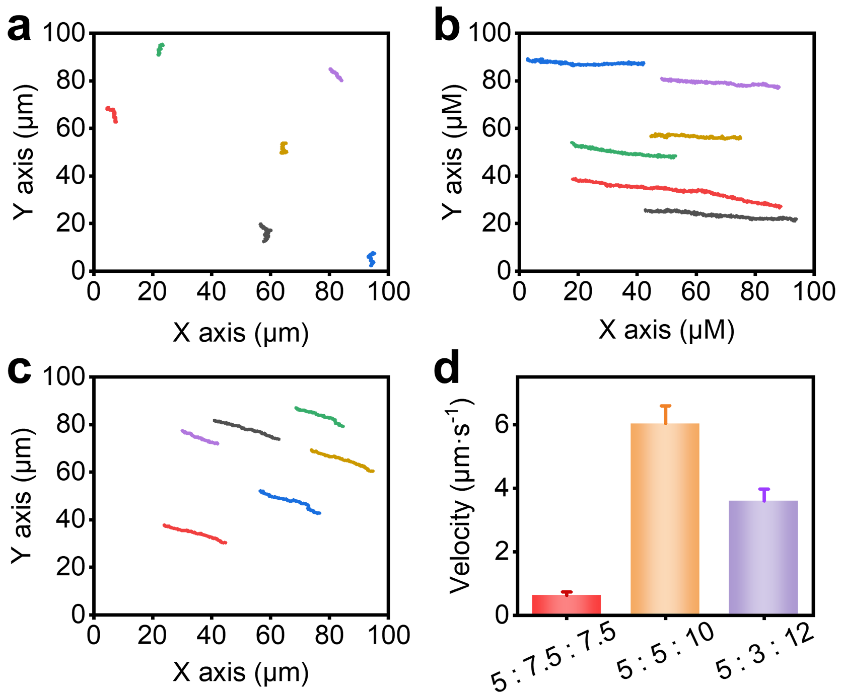


**Supplementary Fig. 16. The motion comparation of RNA condensates assembled with different ratios of 18-G4C2 and 72-P.** Typical tracking paths of RNA condensates assembled with G-31, 18-G4C2 and P-72 at concentration ratios of 5 : 7.5 : 7.5 (**a**), 5 : 5 : 10 (**b**), and 5 : 3 : 12 (**c**) in presence of 10 μM Hemin and 25 mM H2O2. **d**, The velocity of RNA condensates assembled with different ratios of 18-G4C2 and P-72 in presence of 10 μM Hemin and 25 mM H2O2. The error bars indicate mean ± s.d. (n = 6 independent micromotor).


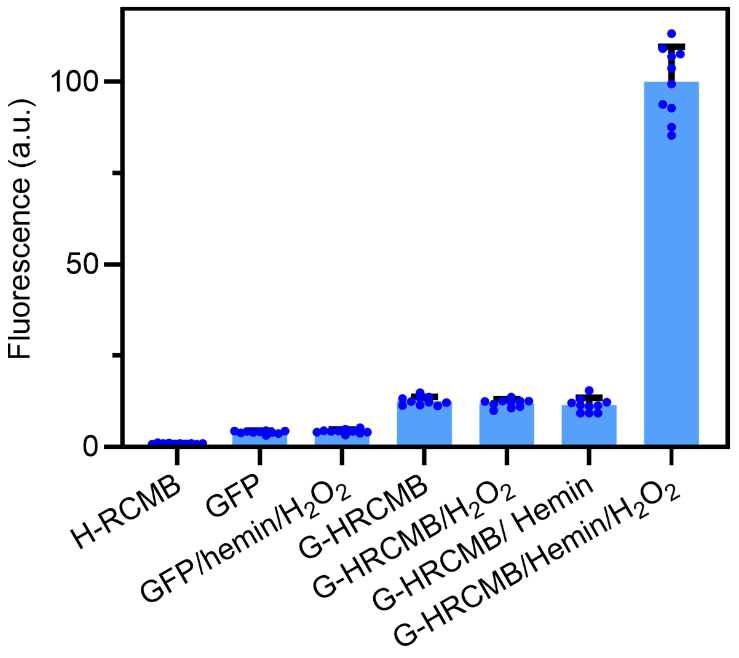


**Supplementary Fig. 17. Cellular fluorescence intensities were quantified in ∼ 10 individual cells based on Fig. 5m.** The error bars indicate mean ± s.d. (n = 10 independent cells).

**Supplementary Table 1.** Sequences of RNAs used in this project

| **Name** | **RNA Sequence (5’-3’)** |
| --- | --- |
| **sBroccoli** | GGA CGG AGA CGG UCG GGU CCA GAU AUU CGU AUC UGU CGA GUA GAG UGU GGG CUC CGU UUU |
| **dBroccoli, 0-dB** | GGA GGA GAC GGU CGG GUC CAU CUG AGA CGG UCG GGU CCA GAU AUU CGU AUC UGU CGA GUA GAG UGU GGG CUC AGA UGU CGA GUA GAG UGU GGG CUC CUC C |
| **31-dB** | GGA GGA GAC GGU CGG GUC CAU CUG AGA CGG UCG GGU CCA GAU AUU CGU AUC UGU CGA GUA GAG UGU GGG CUC AGA UGU CGA GUA GAG UGU GGG CUC CUC CAA AAA CUG CUG CUG CUG CUG CUG CUG CUG CUG CUG CUG CUG CUG CUG CUG CUG CUG CUG CUG CUG CUG CUG CUG CUG CUG CUG CUG CUG CUG CUG CUG |
| **0-C** | GGU GGA CGA GGA AGG AGG UCU GAG GAG GUC ACU GUC CAC C |
| **31-C** | GGU GGA CGA GGA AGG AGG UCU GAG GAG GUC ACU GUC CAC CCU GCU GCU GCU GCU GCU GCU GCU GCU GCU GCU GCU GCU GCU GCU GCU GCU GCU GCU GCU GCU GCU GCU GCU GCU GCU GCU GCU GCU GCU GCU G |
| **31-VC** | GGU GGA CGA GGA AGC AGA UCU GAA GAC GUC ACU GUC CAC CCU GCU GCU GCU GCU GCU GCU GCU GCU GCU GCU GCU GCU GCU GCU GCU GCU GCU GCU GCU GCU GCU GCU GCU GCU GCU GCU GCU GCU GCU GCU G |
| **72-C** | GGU GGA CGA GGA AGG AGG UCU GAG GAG GUC ACU GUC CAC CCU GCU GCU GCU GCU GCU GCU GCU GCU GCU GCU GCU GCU GCU GCU GCU GCU GCU GCU GCU GCU GCU GCU GCU GCU GCU GCU GCU GCU GCU GCU GCU GCU GCU GCU GCU GCU GCU GCU GCU GCU GCU GCU GCU GCU GCU GCU GCU GCU GCU GCU GCU GCU GCU GCU GCU GCU GCU GCU GCU GCU GCU GCU GCU GCU GCU GCU GCU GCU GCU GCU GCU G |
| **Pepper (0-P)** | GGU AUC CCC AAU CGU GGC GUG UCG GCC UGC UUC GGC AGG CAC UGG CGC CGG GAU ACC |
| **31-P** | GGU AUC CCC AAU CGU GGC GUG UCG GCC UGC UUC GGC AGG CAC UGG CGC CGG GAU ACC CUG CUG CUG CUG CUG CUG CUG CUG CUG CUG CUG CUG CUG CUG CUG CUG CUG CUG CUG CUG CUG CUG CUG CUG CUG CUG CUG CUG CUG CUG CUG |
| **31-VP1** | GGU AAC AAC AAU AGA UUC GGU AAG CUC UGU CUA CGA CGA GAC UGC CUC CGG GAU ACC CUG CUG CUG CUG CUG CUG CUG CUG CUG CUG CUG CUG CUG CUG CUG CUG CUG CUG CUG CUG CUG CUG CUG CUG CUG CUG CUG CUG CUG CUG CUG |

**Supplementary Table 1.** continued from previous page

| **Name** | **RNA Sequence (5’-3’)** |
| --- | --- |
| **31-VP1** | GGU AAC AAC AAU AGA UUC GGU AAG CUC UGU CUA CGA CGA GAC UGC CUC CGG GAU ACC CUG CUG CUG CUG CUG CUG CUG CUG CUG CUG CUG CUG CUG CUG CUG CUG CUG CUG CUG CUG CUG CUG CUG CUG CUG CUG CUG CUG CUG CUG CUG |
| **31-VP2** | GGU AUC CCA CAU AGU ACA AAU CGU CGA CGC UGA CUG CCA AGG AAA GAC CGG GAU ACC CUG CUG CUG CUG CUG CUG CUG CUG CUG CUG CUG CUG CUG CUG CUG CUG CUG CUG CUG CUG CUG CUG CUG CUG CUG CUG CUG CUG CUG CUG CUG |
| **72-P** | UAU CCC CAA UCG UGG CGU GUC GGC CUG CUU CGG CAG GCA CUG GCG CCG GGA UAC CCU GCU GCU GCU GCU GCU GCU GCU GCU GCU GCU GCU GCU GCU GCU GCU GCU GCU GCU GCU GCU GCU GCU GCU GCU GCU GCU GCU GCU GCU GCU GCU GCU GCU GCU GCU GCU GCU GCU GCU GCU GCU GCU GCU GCU GCU GCU GCU GCU GCU GCU GCU GCU GCU GCU GCU GCU GCU GCU GCU GCU GCU GCU GCU GCU GCU GCU GCU GCU GCU GCU GCU G |
| **10-CUG** | CUG CUG CUG CUG CUG CUG CUG CUG CUG CUG |
| **20-CUG** | CUG CUG CUG CUG CUG CUG CUG CUG CUG CUGCUG CUG CUG CUG CUG CUG CUG CUG CUG CUG |
| **37-CUG** | CUG CUG CUG CUG CUG CUG CUG CUG CUG CUGCUG CUG CUG CUG CUG CUG CUG CUG CUG CUG CUG CUG CUG CUG CUG CUG CUG CUG CUG CUGCUG CUG CUG CUG CUG CUG CUG |
| **1-G4C2** | GGG GCC |
| **2-G4C2** | GGG GCC GGG GCC |
| **5-G4C2** | GGG GCC GGG GCC GGG GCC GGG GCC GGG GCC |
| **9-G4C2** | GGG GCC GGG GCC GGG GCC GGG GCC GGG GCC GGG GCC GGG GCC GGG GCC GGG GCC |
| **18-G4C2** | GGG GCC GGG GCC GGG GCC GGG GCC GGG GCC GGG GCC GGG GCC GGG GCC GGG GCC GGG GCC GGG GCC GGG GCC GGG GCC GGG GCC GGG GCC GGG GCC GGG GCC GGG GCC |
| **H1** | GGU AUC CCA CAU AAU AAC CGG GAU ACC |
| **31-H1** | GGU AUC CCA CAU AAU AAC CGG GAU ACC CUG CUG CUG CUG CUG CUG CUG CUG CUG CUG CUG CUG CUG CUG CUG CUG CUG CUG CUG CUG CUG CUG CUG CUG CUG CUG CUG CUG CUG CUG CUG |
| **H2** | GGU AUC CCA CAU AAU ACA AAU AGC UGC CCG GGA UAC C |
| **31-H2** | GGU AUC CCA CAU AAU ACA AAU AGC UGC CCG GGA UAC CCU GCU GCU GCU GCU GCU GCU GCU GCU GCU GCU GCU GCU GCU GCU GCU GCU GCU GCU GCU GCU GCU GCU GCU GCU GCU GCU GCU GCU GCU GCU G |

**Supplementary Table 1.** continued from previous page

| **Name** | **RNA Sequence (5’-3’)** |
| --- | --- |
| **31-H3** | GGU AUC CCA CAU AAU ACA AAU AGC UGC CAA GGA AAG ACC GGG AUA CCC UGC UGC UGC UGC UGC UGC UGC UGC UGC UGC UGC UGC UGC UGC UGC UGC UGC UGC UGC UGC UGC UGC UGC UGC UGC UGC UGC UGC UGC UGC UG |
| **S1** | GGA ACA UAA CAU AAU AAC CGG GAU ACC |
| **31-S1** | GGA ACA UAA CAU AAU AAC CGG GAU ACC CUG CUG CUG CUG CUG CUG CUG CUG CUG CUG CUG CUG CUG CUG CUG CUG CUG CUG CUG CUG CUG CUG CUG CUG CUG CUG CUG CUG CUG CUG CUG |
| **S2** | GGA ACA UAA CAU AAU ACA AUA GAC UCG CCG GGA UAC C |
| **31-S2** | GGA ACA UAA CAU AAU ACA AUA GAC UCG CCG GGA UAC CCU GCU GCU GCU GCU GCU GCU GCU GCU GCU GCU GCU GCU GCU GCU GCU GCU GCU GCU GCU GCU GCU GCU GCU GCU GCU GCU GCU GCU GCU GCU G |
| **31-S3** | GGA ACA UAA CAU AAU ACA AUA GAC UCG CAA GGA AAG ACC GGG AUA CCC UGC UGC UGC UGC UGC UGC UGC UGC UGC UGC UGC UGC UGC UGC UGC UGC UGC UGC UGC UGC UGC UGC UGC UGC UGC UGC UGC UGC UGC UGC UG |
| **31-G** | GGA GCU UCU GGA CUG CGA UGG GAG CAC GAA ACG UCG UGG CGC AAU UGG GUG GGG AAA GUC CUU AAA AGA GGG CCA CCA CAG AAG CUC UGC UGC UGC UGC UGC UGC UGC UGC UGC UGC UGC UGC UGC UGC UGC UGC UGC UGC UGC UGC UGC UGC UGC UGC UGC UGC UGC UGC UGC UGC UG |
| **31-VC2** | GGU GAA AGA AGA AGG AGA UCU GAA GAC GUC ACU GUC CAC CCU GCU GCU GCU GCU GCU GCU GCU GCU GCU GCU GCU GCU GCU GCU GCU GCU GCU GCU GCU GCU GCU GCU GCU GCU GCU GCU GCU GCU GCU GCU G |
| **31-E** | GGA UGA CAA GGA CAC UGA AAU AAA CGU AUC CCU UUU CGC GUC CUU AUU UCA GUG UCC UUG UCA UAG GUG GAC GAG GAA GGA GGU CUG AGG AGG UCA CUG UCC ACC CUG CUG CUG CUG CUG CUG CUG CUG CUG CUG CUG CUG CUG CUG CUG CUG CUG CUG CUG CUG CUG CUG CUG CUG CUG CUG CUG CUG CUG CUG CUG |

**Supplementary Table 2.** Sequences of DNAs used in this project

| **Name** | **DNA Sequence (5’-3’)** |
| --- | --- |
| **6 × CAG** | TAMRA-CAG CAG CAG CAG CAG CAG |
| **S3 blocker** | Cy5-GCG AGT CTA TTG TAT TAT GTT ATG TTC C |
| **EpCAM Forward** | AAC TAC AAG CTG GCC GTA |
| **EpCAM Reverse** | CAG GTT TTG CTC TTC TCC |
| **β-actin Forward** | CTC TTC CAG CCT TCC TTC CT |
| **β-actin Reverse** | GGG CAG TGA TCT CTT TCT GC |

**Video S1**- **Typical tracking paths of RCM** after incubation without (**a**), and with 25 mM H2O2 (**b**), 10 μM Hemin (**c**), or 25 mM H2O2 and 10 μM Hemin (**d**,TD; **e**, SYBR Gold field), and 31-VC2 incubated with 25 mM H2O2 and 10 μM Hemin (**f**).

**Video S2**- **Typical tracking paths of the RCM incubated with different concentrations of H2O2.** Motion behavior analysis of the RCM at H2O2 concentrations of 1 mM (**a**), 5 mM (**b**), 10 mM (**c**), 15 mM (**d**), 20 mM (**e**) and 25 mM (**f**).

**Video S3**- **The motion comparation of RNA condensates assembled with different ratios of 18-G4C2 and 72-P.** Typical tracking paths of RNA condensates assembled with G-31, 18-G4C2 and P-72 at concentration ratios of 5 : 7.5 : 7.5 (**a**), 5 : 5 : 10 (**b**), and 5 : 3 : 12 (**c**) in presence of 10 μM Hemin and 25 mM H2O2. Videos were collected with an excitation at 488 nm (GFP).

**Video S4**- **The motion comparations of G-HRCMB and G-SRCMB.** Typical tracking paths of HRCMB (**a**), G-HRCMB (**b**), H-GRCMB incubated with 10 μM Hemin and 25 mM H2O2 (**c**), SRCMB (**d**), G-SRCMB (**e**), or G-SRCMB incubated with 10 μM Hemin and 25 mM H2O2 (**f**). Videos were collected with an excitation at 561 nm (4S GelRed, Red) or 488 nm (GFP, Green).

**Video S5**- **Typical tracking paths of E-RCM** after incubation without (**a**), and with the mixture of 25 mM H2O2 and 10 μM Hemin (**b**).
